# Supplementary material for: Relationships between Prediction Accuracy, Metacognitive Reflection, and Performance in Introductory Genetics Students
Source: Atypon-hosted journal article supplement (doi:10.1187/cbe.21-12-0341), 2022-08-22
Supplement: combinedsupmats.pdf [file combinedsupmats.pdf]

# Supplemental Material

*CBE—Life Sciences Education*

Knight *et al.*

## Supplementary Materials

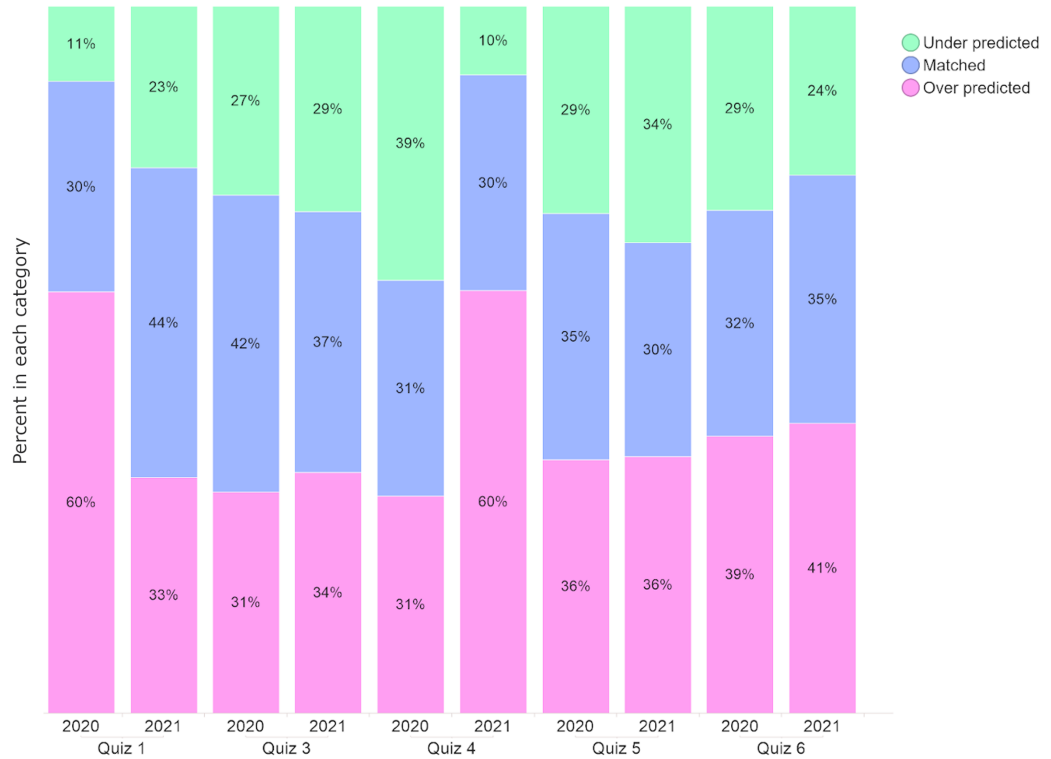

**Supplementary Figure 1.** Percent of students who underpredicted, matched and overpredicted for each quiz. The only significant differences between quizzes or years are for Quiz 1 2020 and Quiz 4 2021. For these two quizzes, there were significantly more overpredictors than the matching quiz from the other year (chi square,  $p < 0.001$ ). Otherwise, the proportion of under, matched and overpredictors does not differ by quiz or year (chi square,  $p > 0.05$ ).

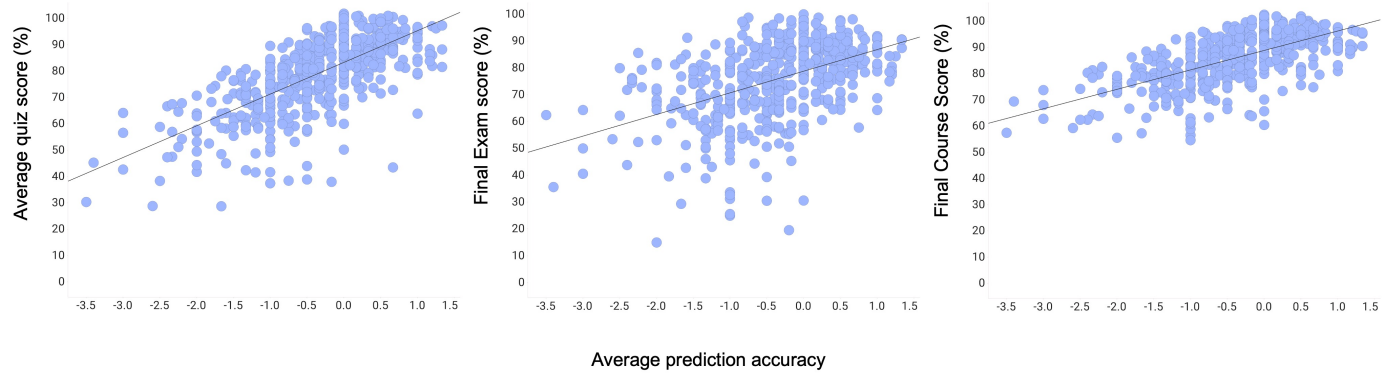

**Supplementary Figure 2.** Students' average quiz prediction accuracy is significantly correlated (linear regression;  $p < 0.001$ ) with average quiz accuracy ( $r = 0.69$ ,  $r^2 = 0.48$ ), final exam grade ( $r = 0.46$ ,  $r^2 = 0.21$ ) and overall course grade ( $r = 0.64$ ,  $r^2 = 0.40$ ).  $n = 497$

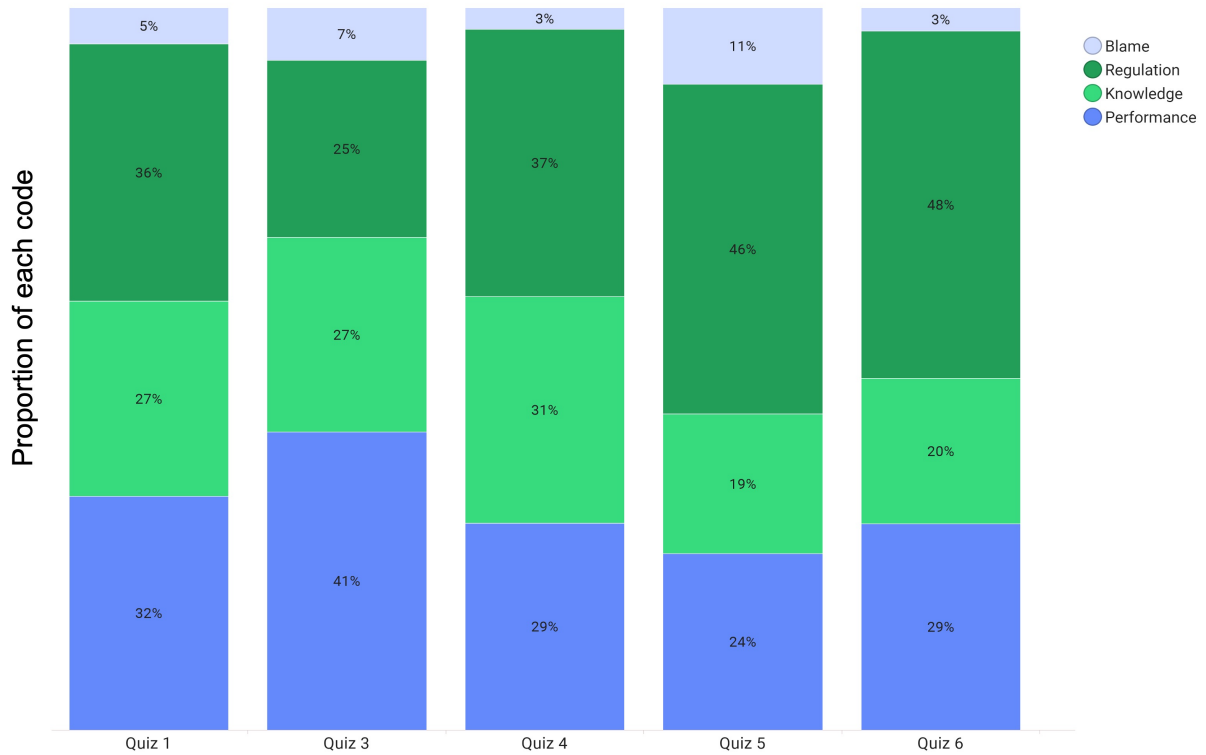

**Supplementary Figure 3.** Proportion of Performance, Knowledge, Regulation and Blame codes out of total codes for each quiz. A single student response can have more than one code. Quiz 1: 295 codes; Quiz 3: 618 codes; Quiz 4: 204 codes; Quiz 5: 517 codes; Quiz 6: 524 codes. The distributions of different codes are not different across quizzes; chi square,  $p > .05$ .
